# Supplementary material for: Influence of a chronic beta-blocker therapy on perioperative opioid consumption – a post hoc secondary analysis
Source: Springer Nature journal article supplement (doi:10.1186/s12871-024-02456-2), 2024-02-27
Supplement: MOESM1 [file 26791000]

Supplementary Figure 1: Bivariate regression analysis of morphine index (mg/Body mass index) and dose equivalence of beta-blockers (%).

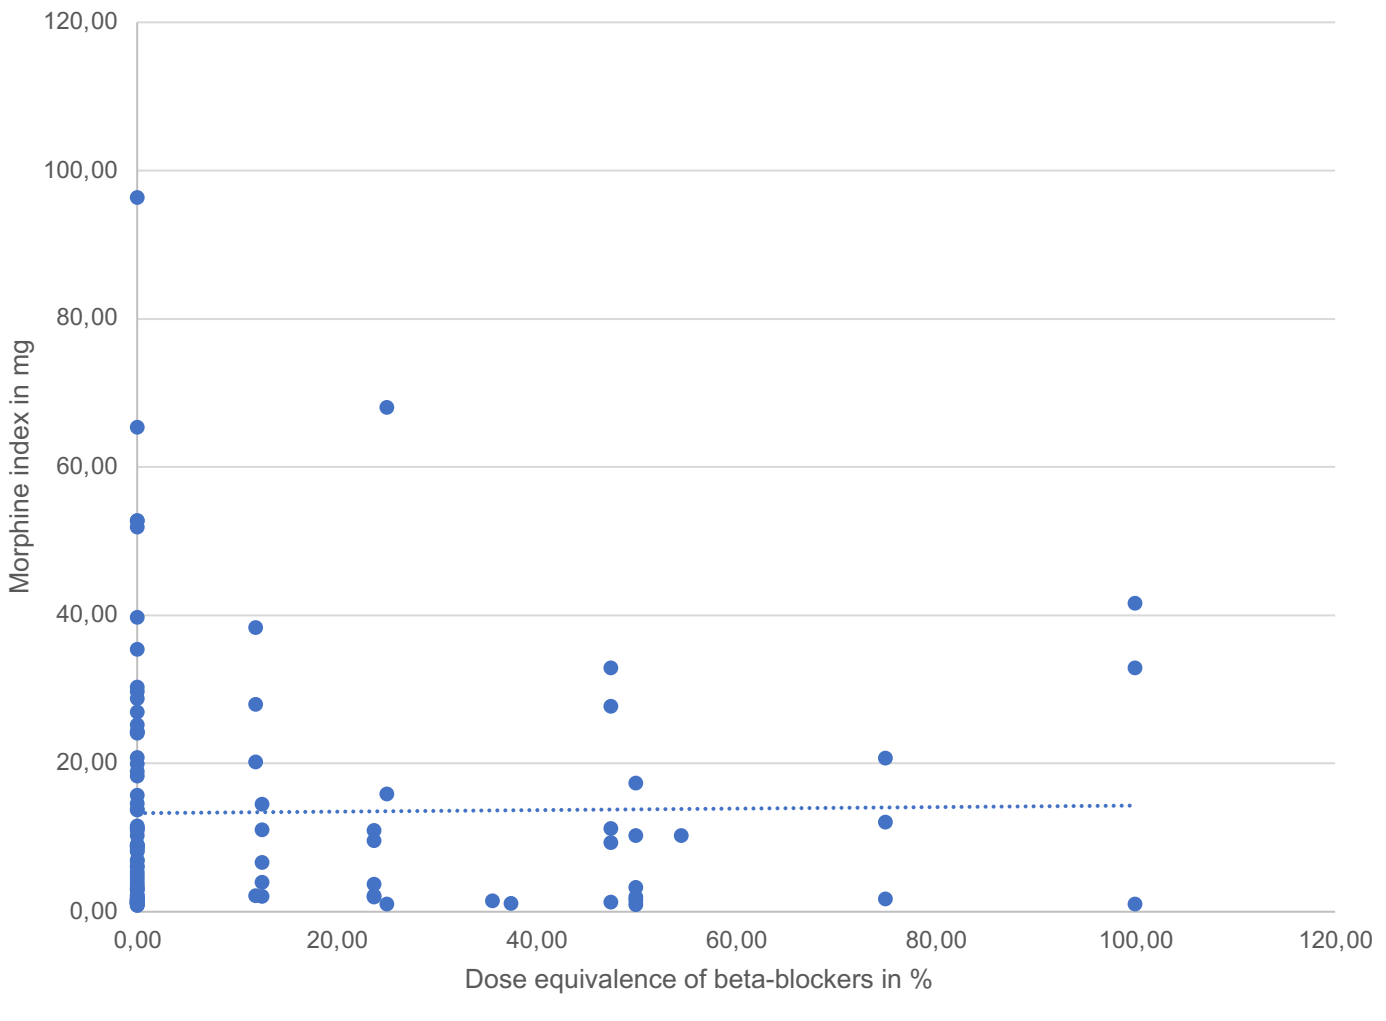

Regression equivalent for beta (95% confidence interval) = 0.010 (-0.12;0.14) (n = 106)
